# Supplementary material
Source: PubMed Central journal article supplement (PMC5052114)
Supplement: NIHMS789382-supplement.pdf [file NIHMS789382-supplement.pdf]

## Supporting Information

### **Synthesis and evaluation of duocarmycin SA analogs incorporating the methyl 1,2,8,8a-tetrahydrocyclopropa[*c*]imidazolo[4,5-*e*]indol-4-one-6-carboxylate (CImI) alkylation subunit**

Prem B. Chanda, Kristopher E. Boyle, Daniel M. Brody, Vyom Shukla, and Dale L. Boger\*

*Department of Chemistry and the Skaggs Institute for Chemical Biology, The Scripps Research Institute, 10550 North Torrey Pines Road, La Jolla, California 92037, USA*

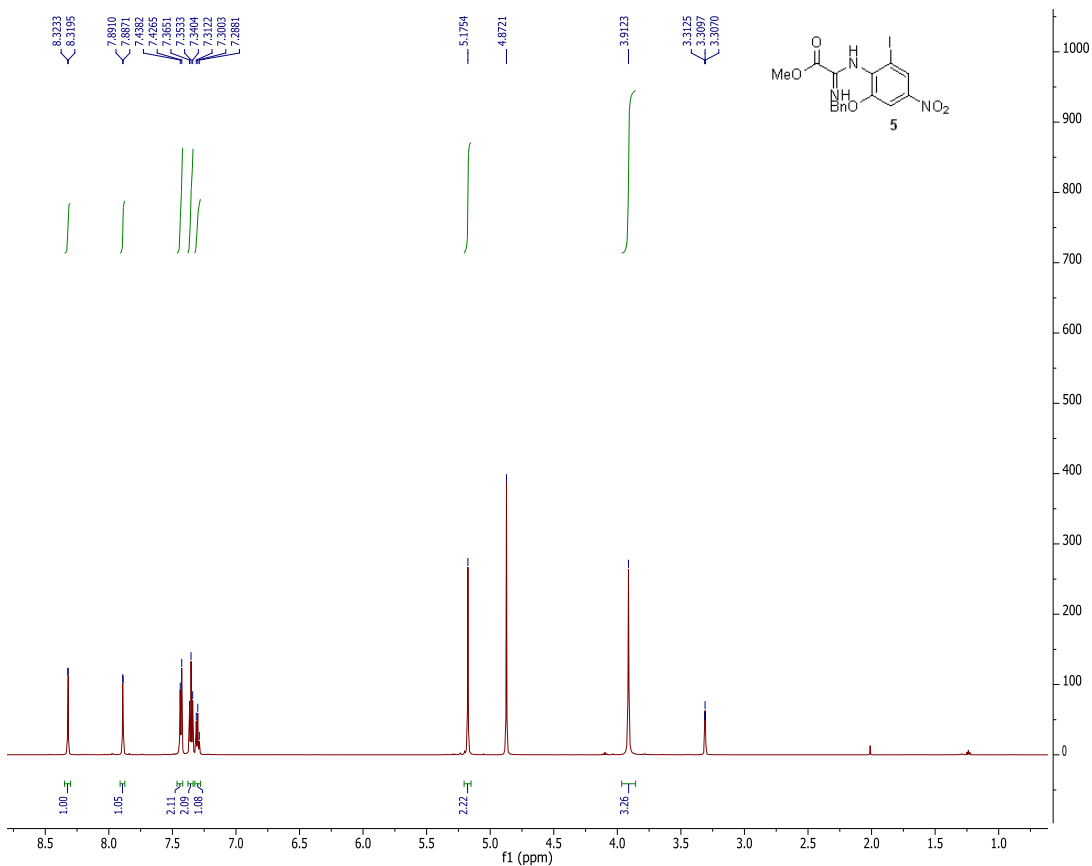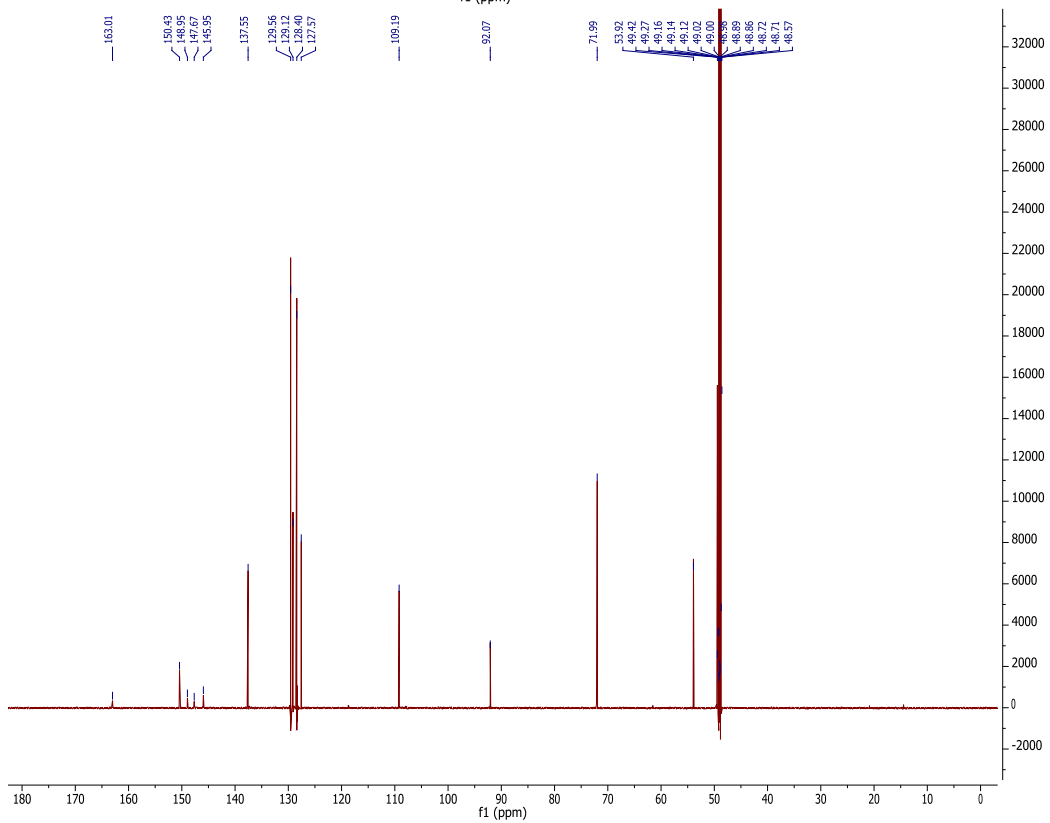

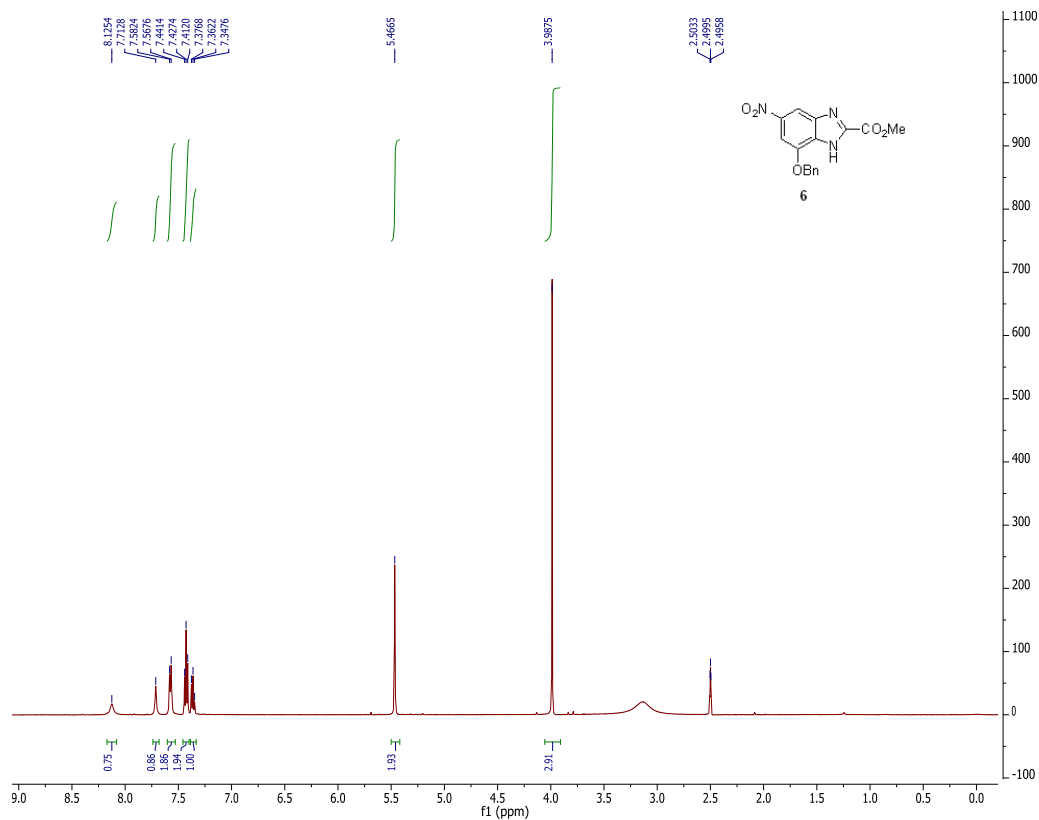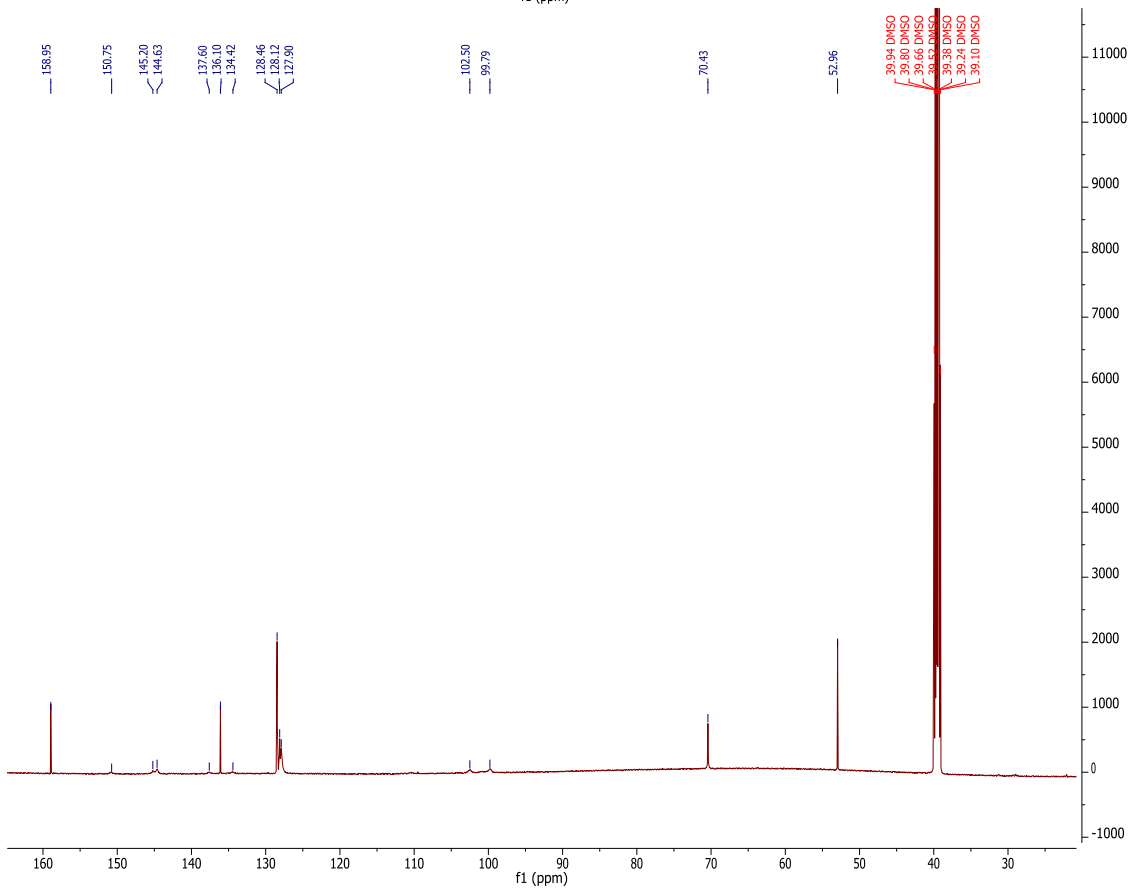

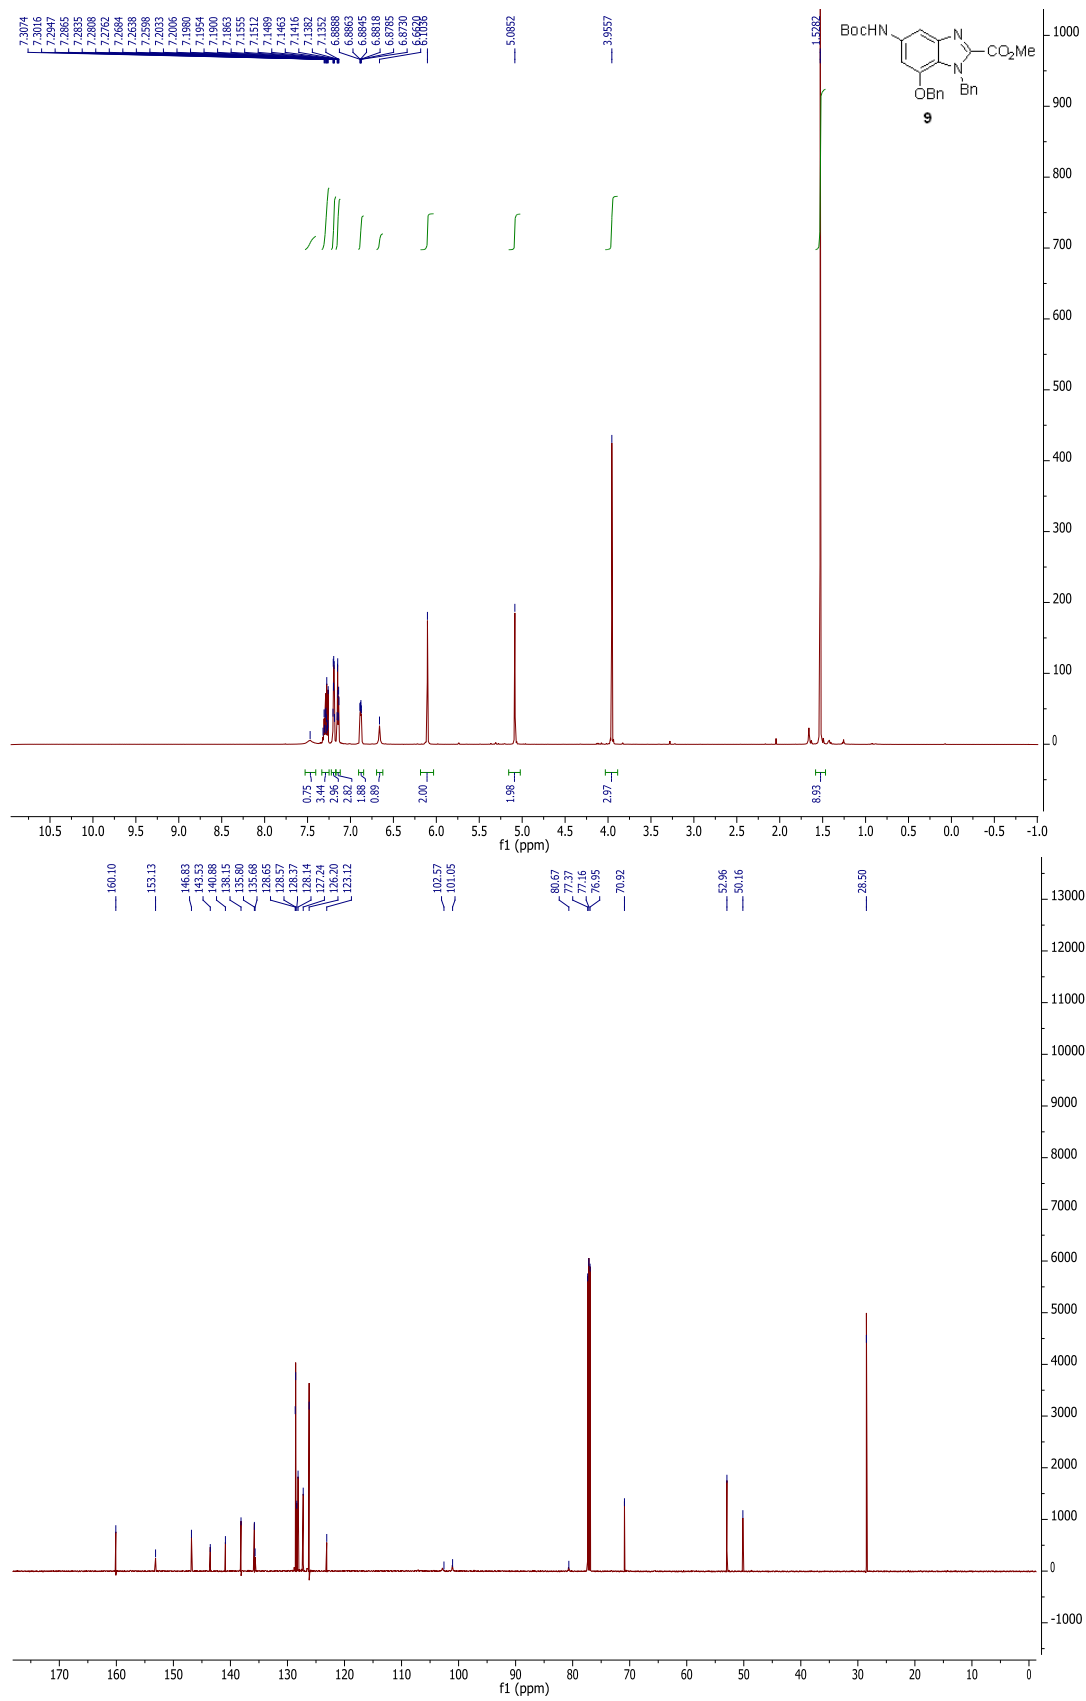

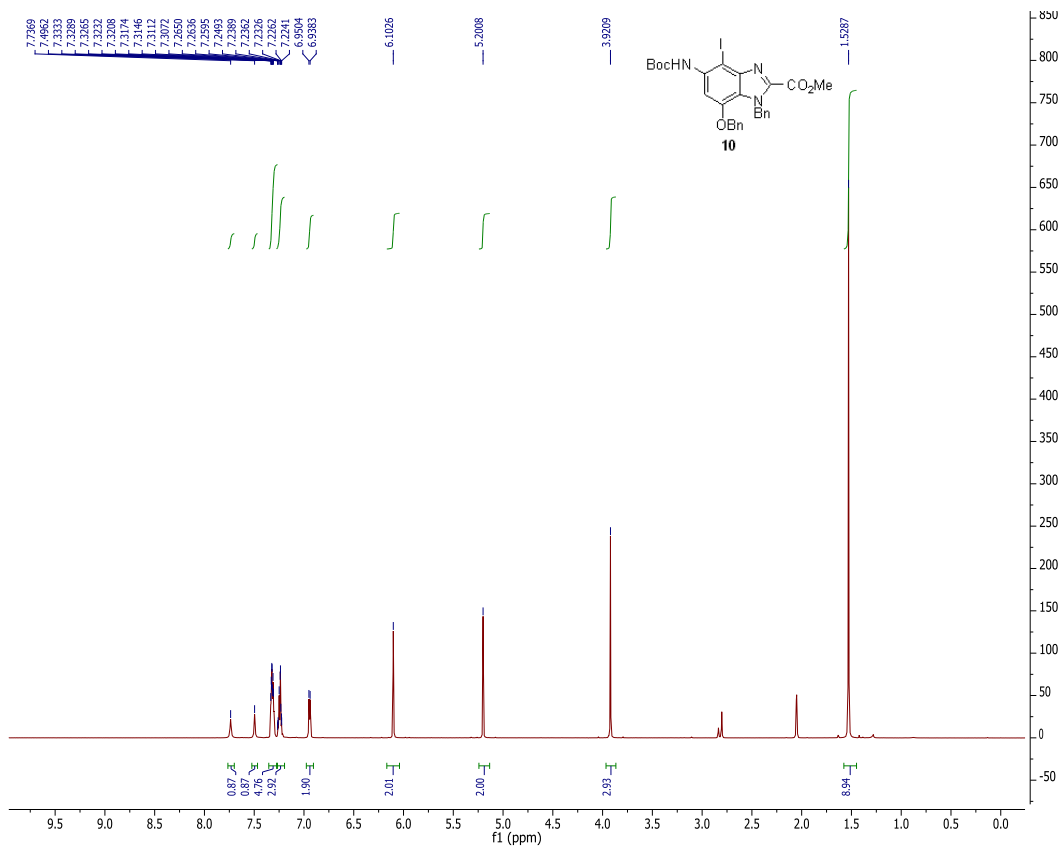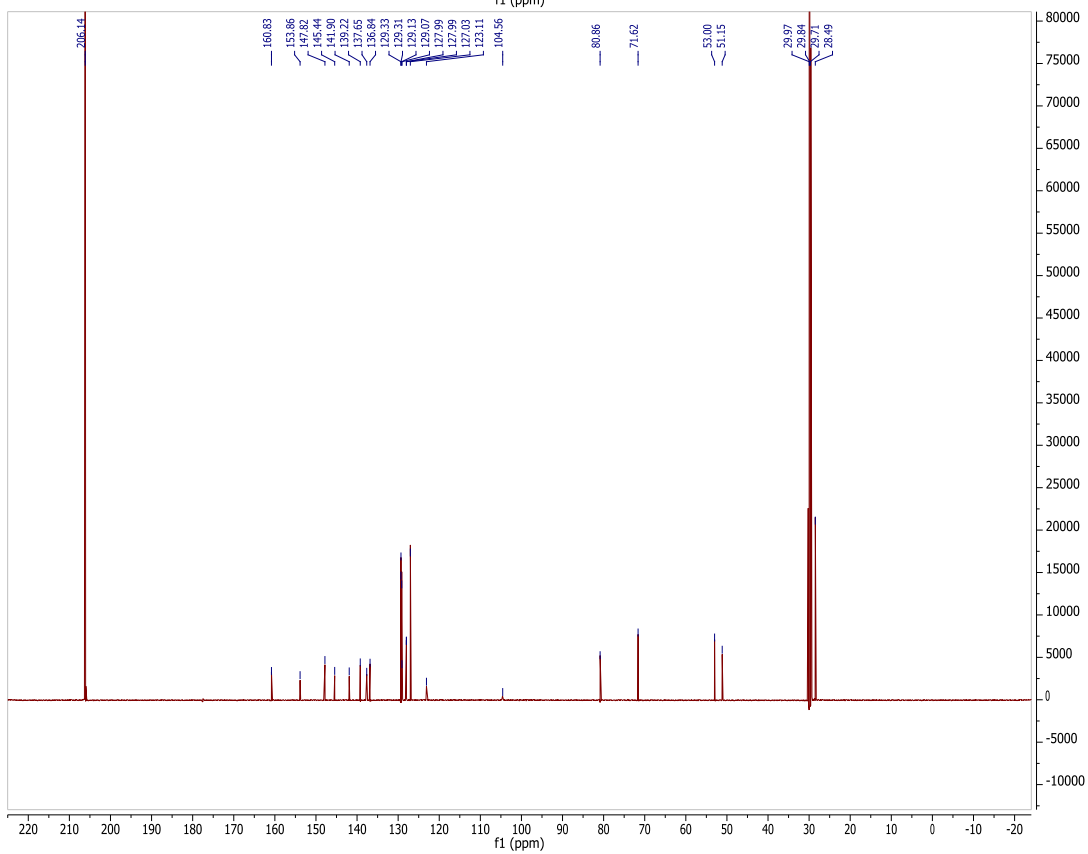

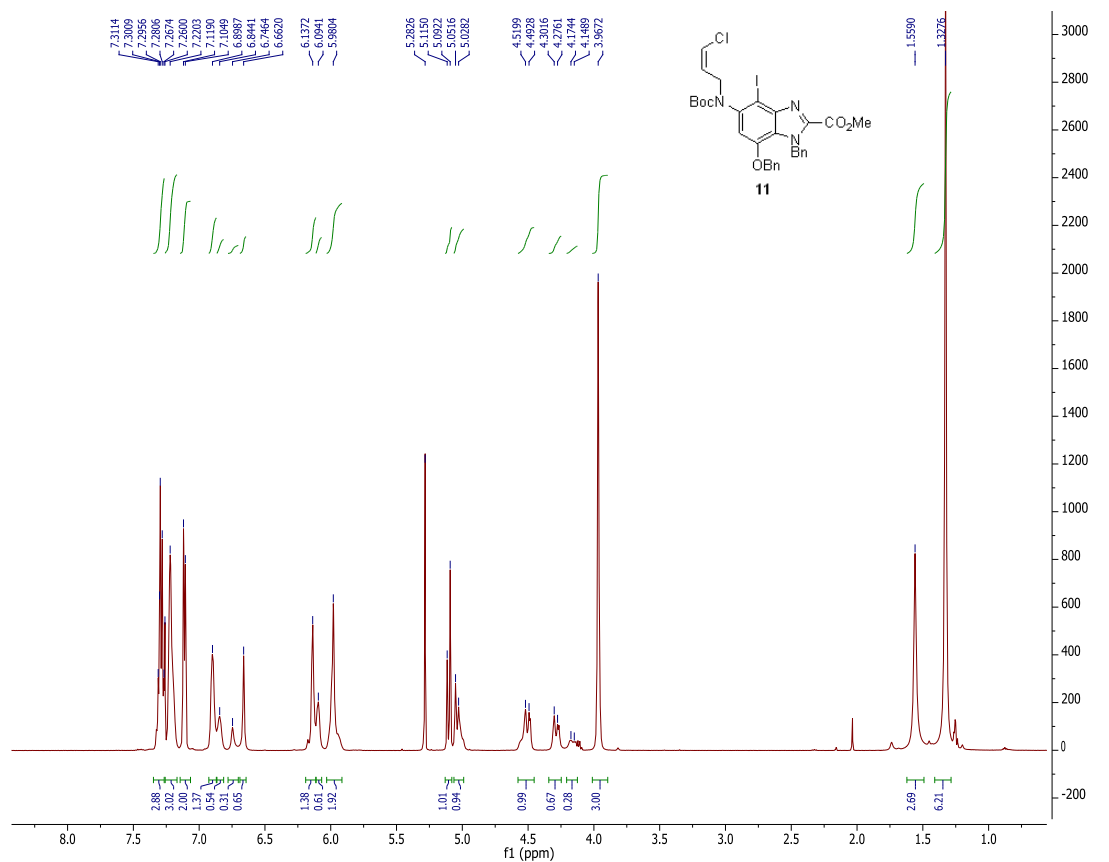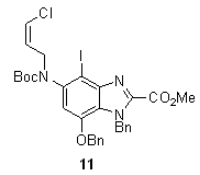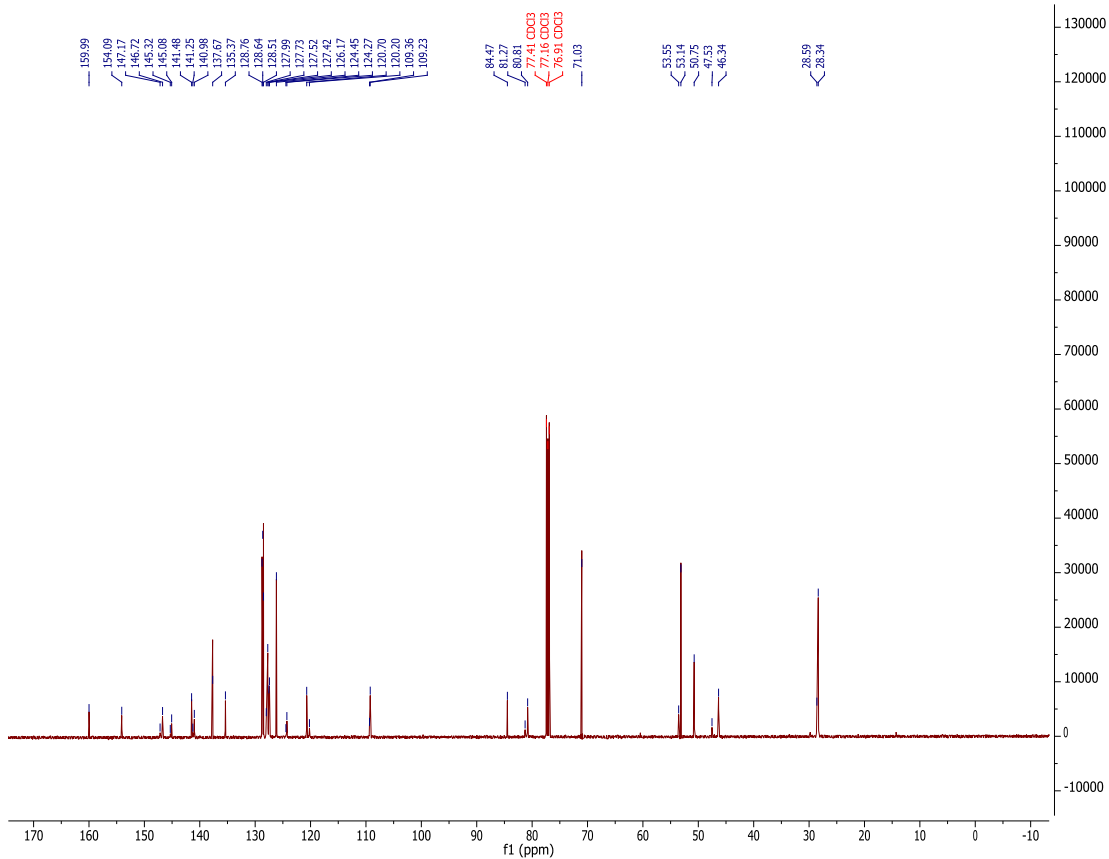

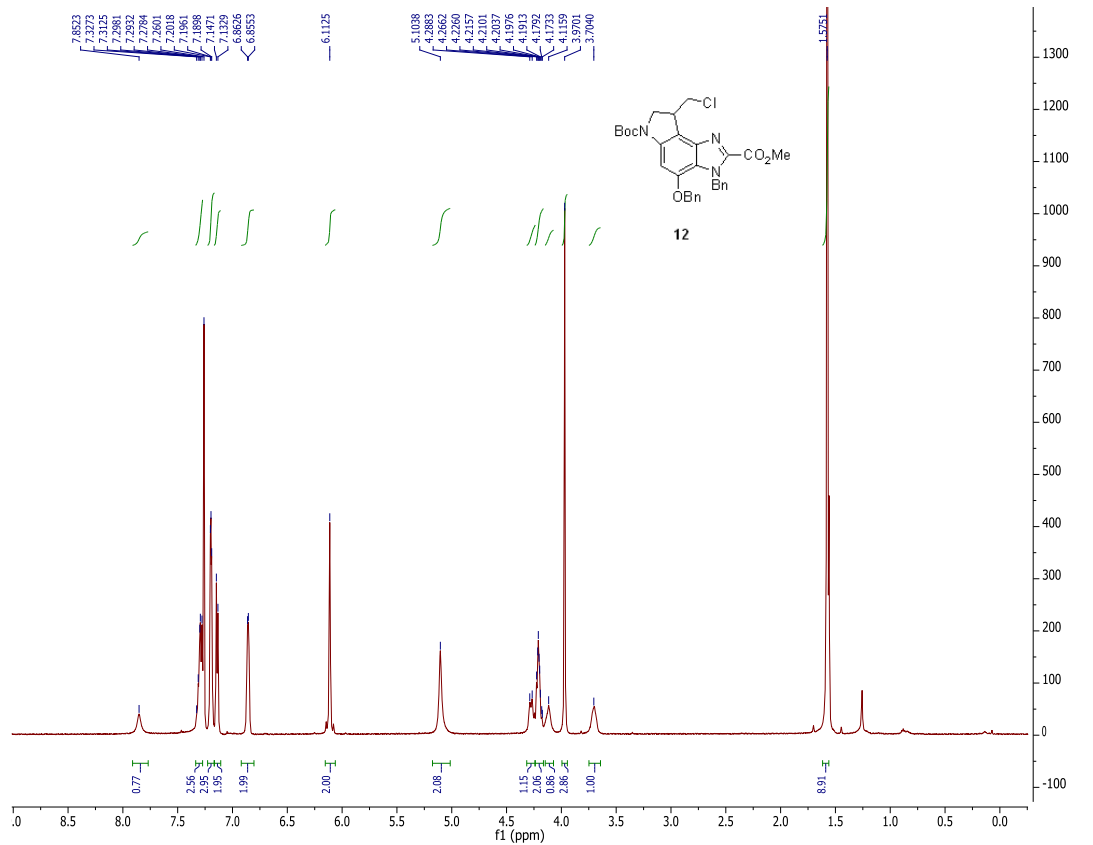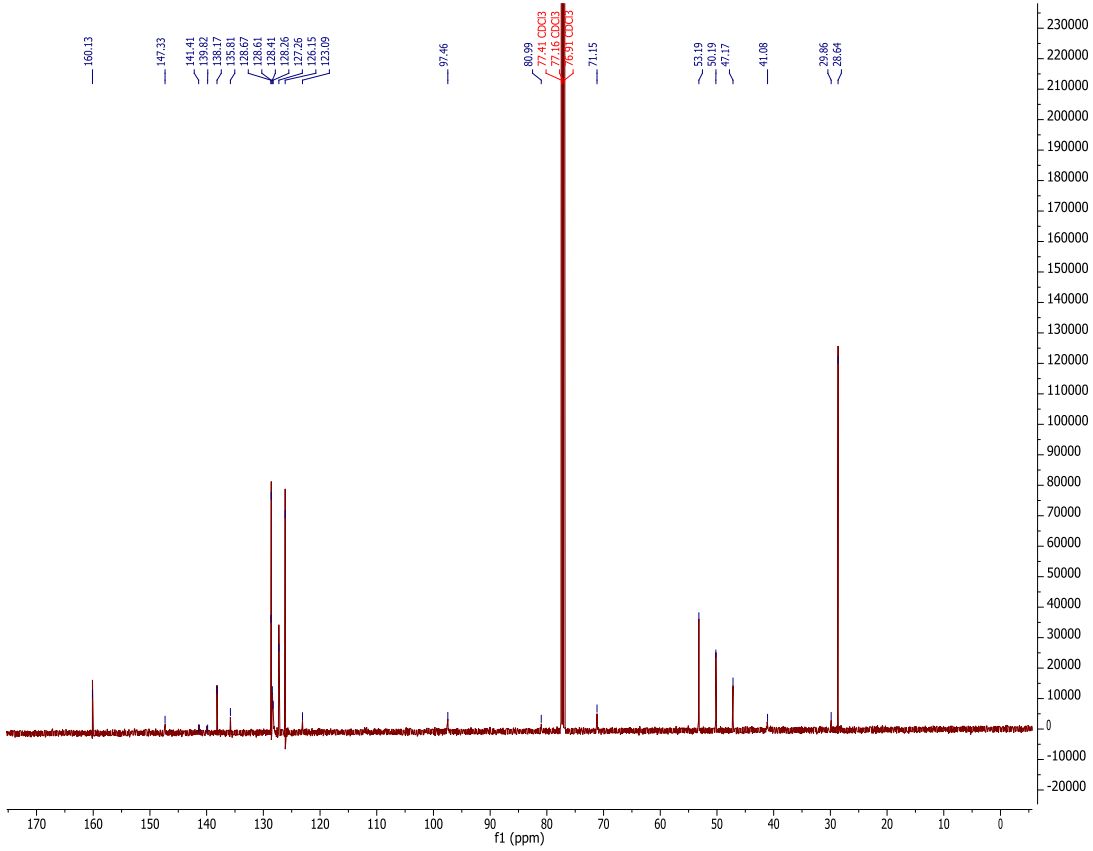

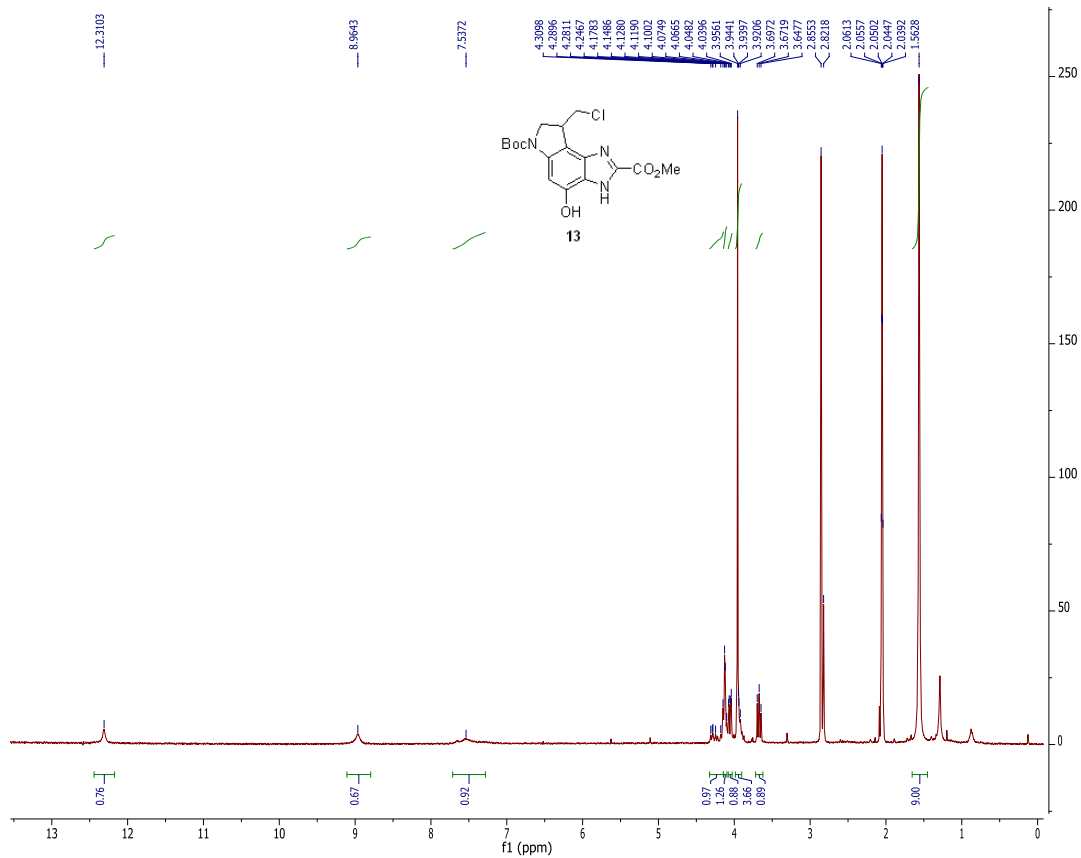



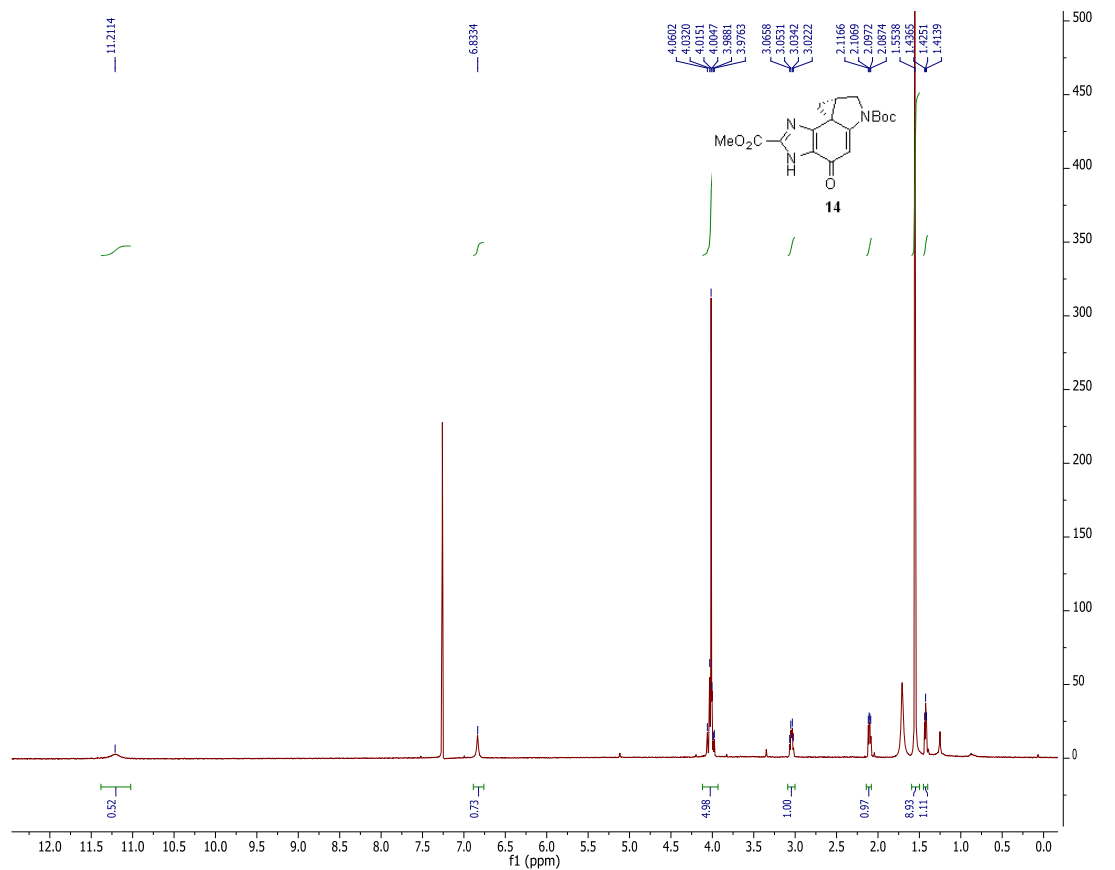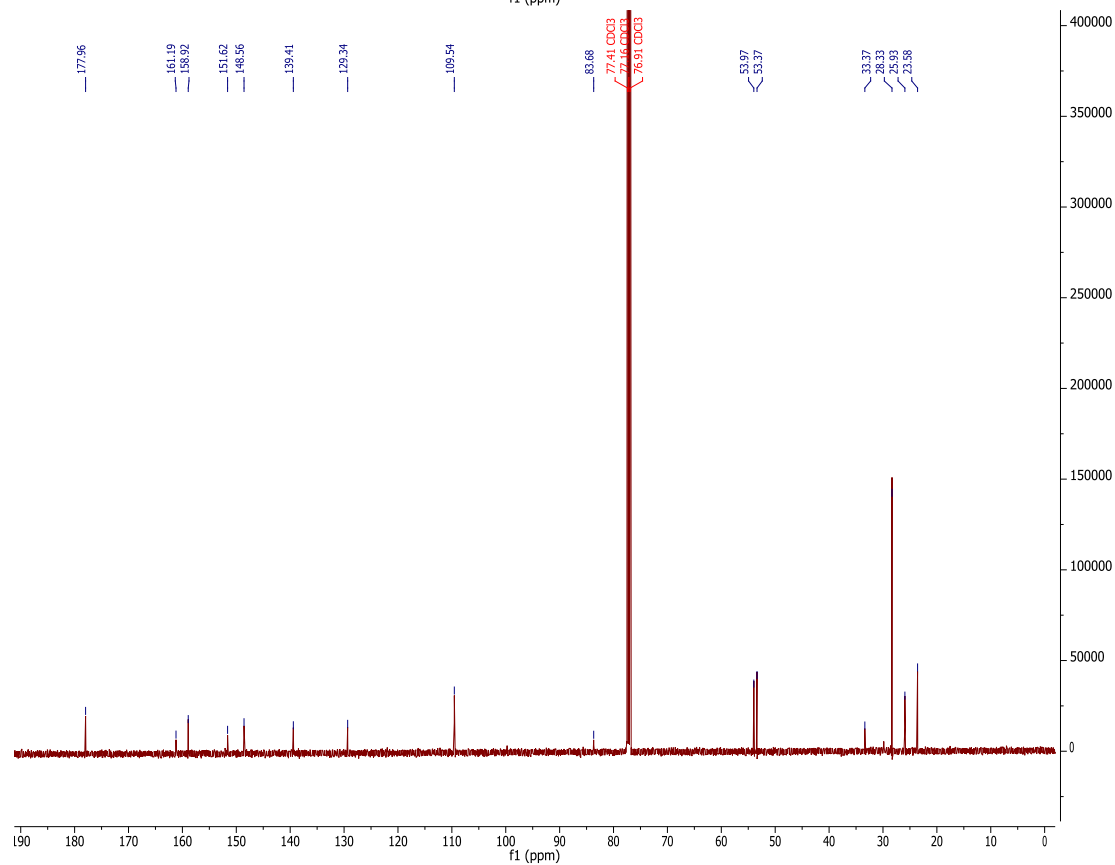

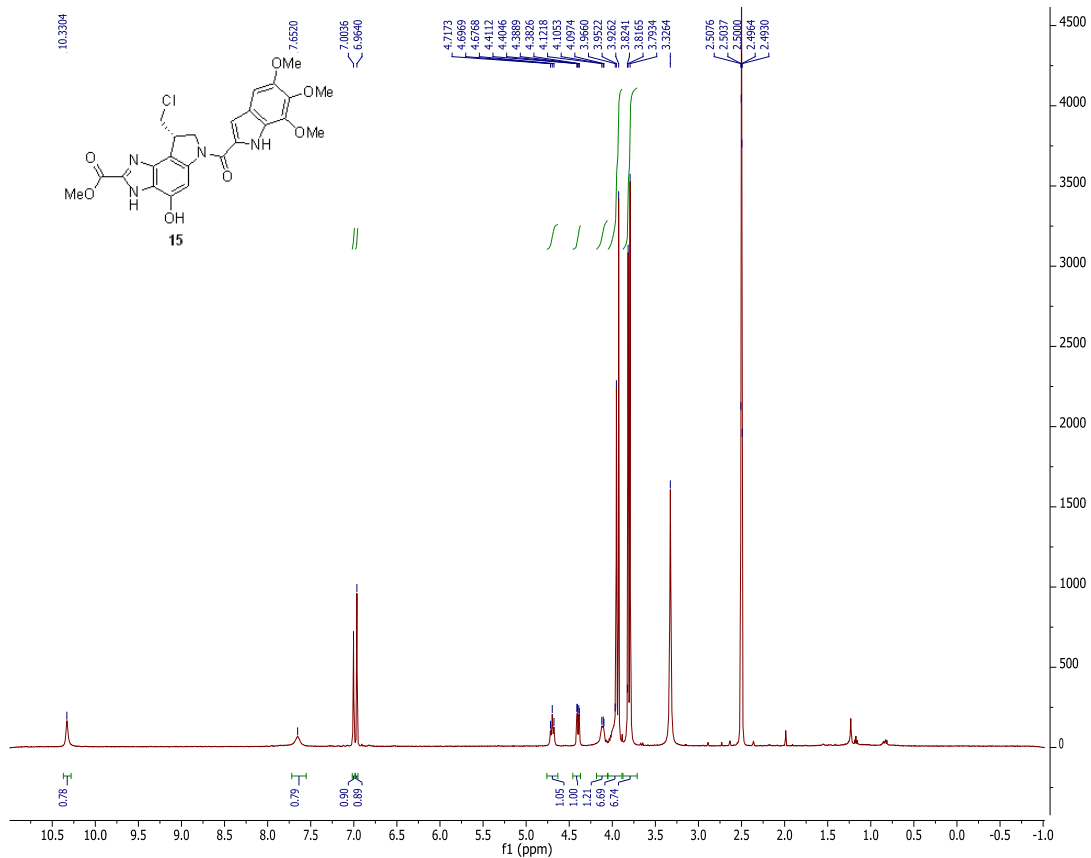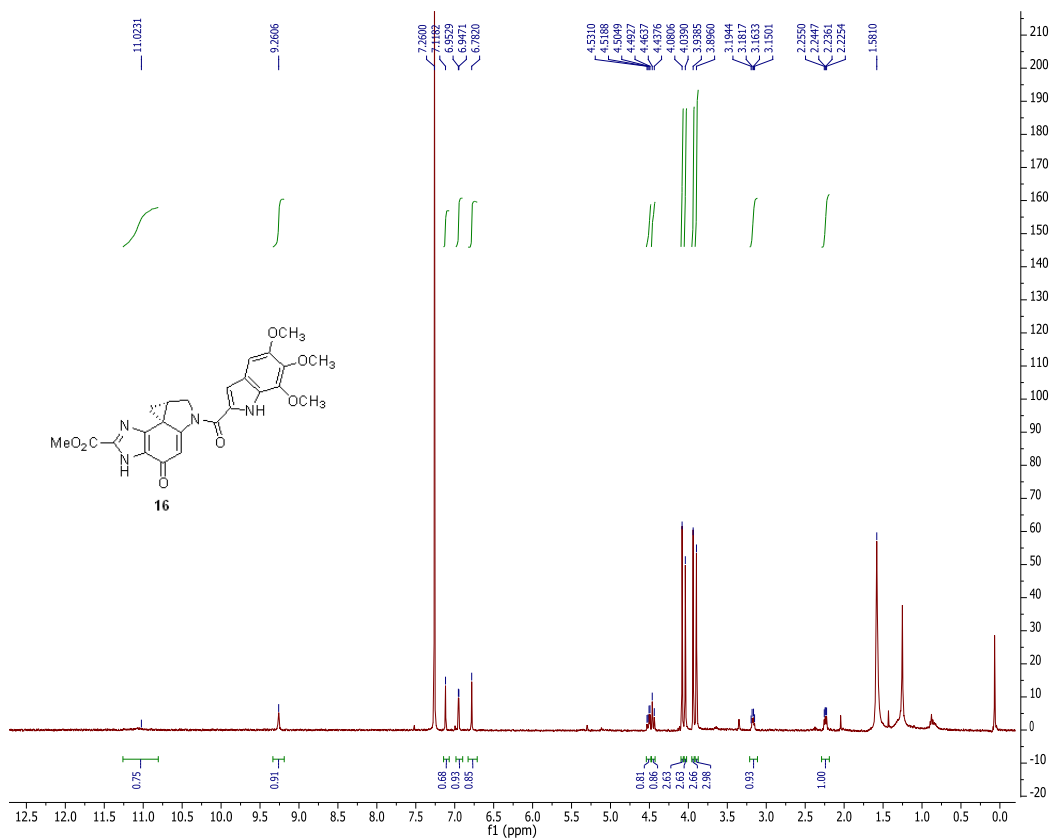

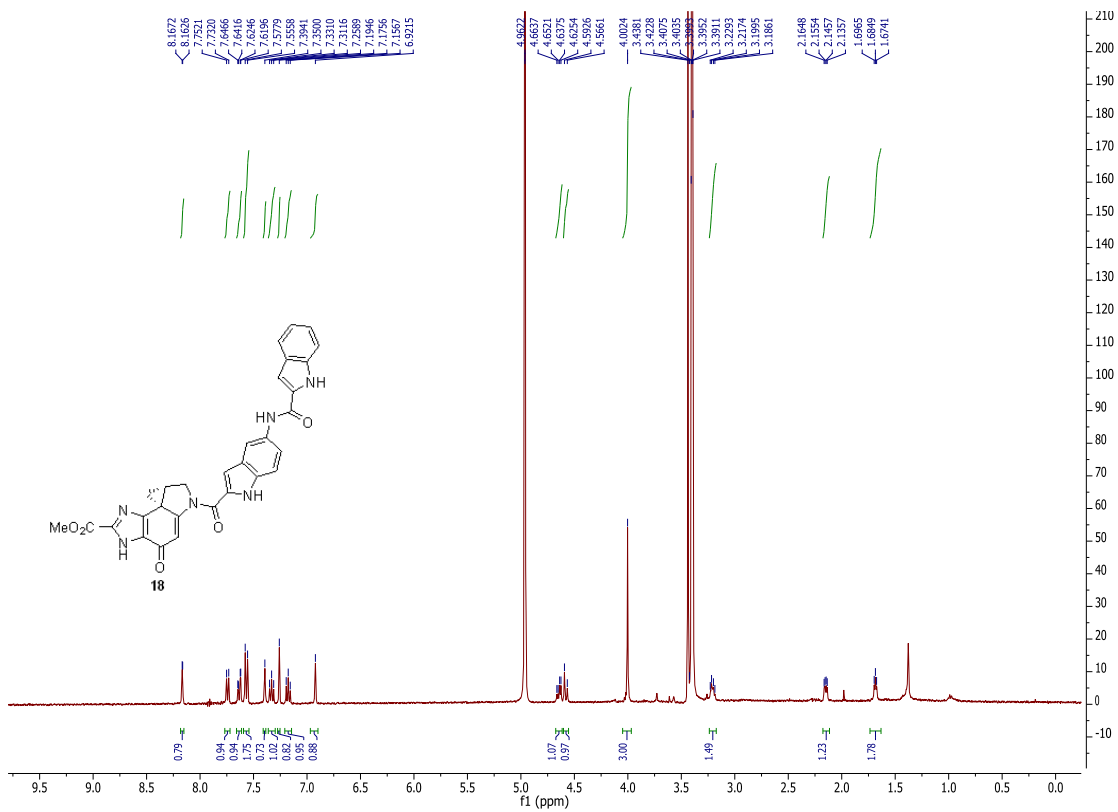

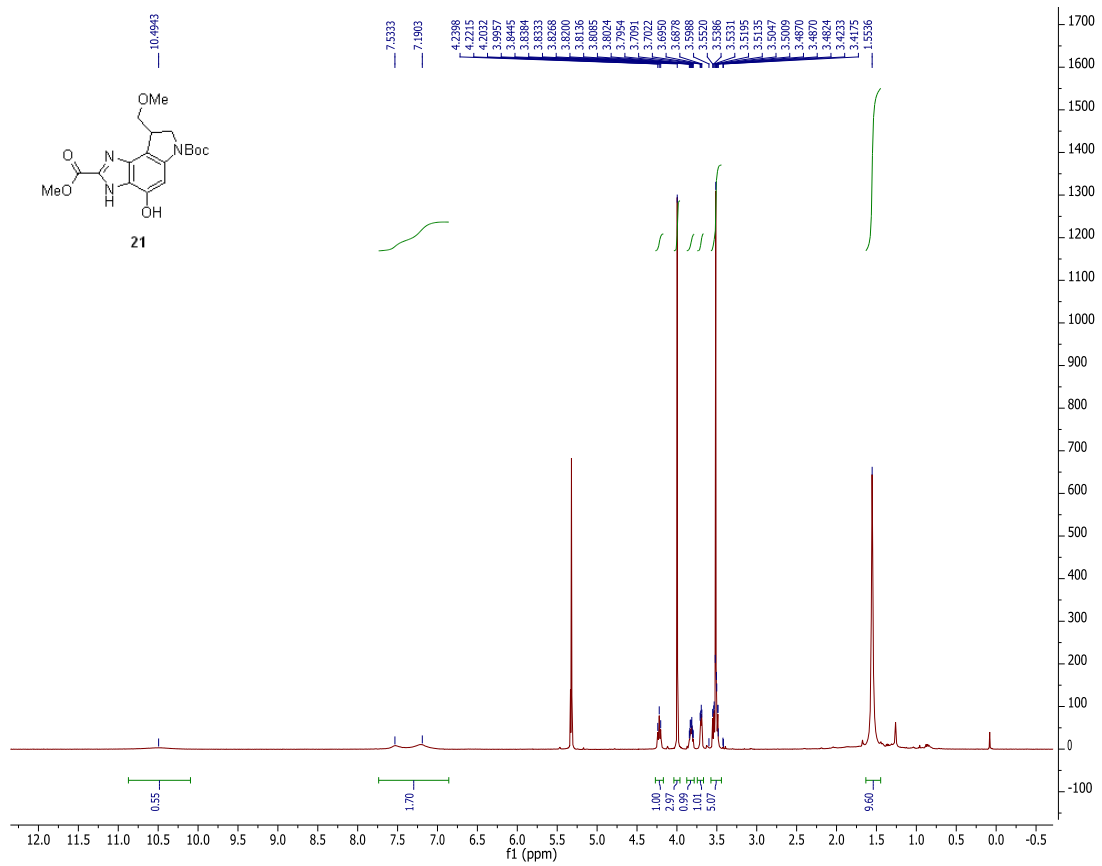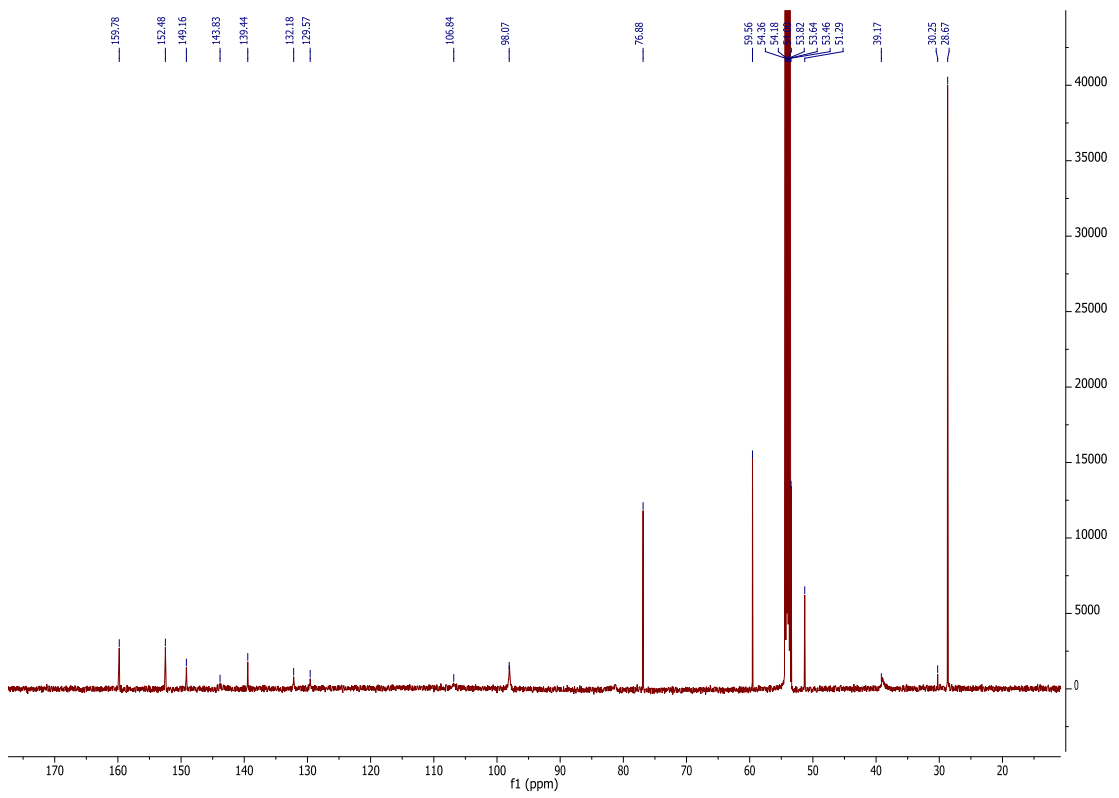

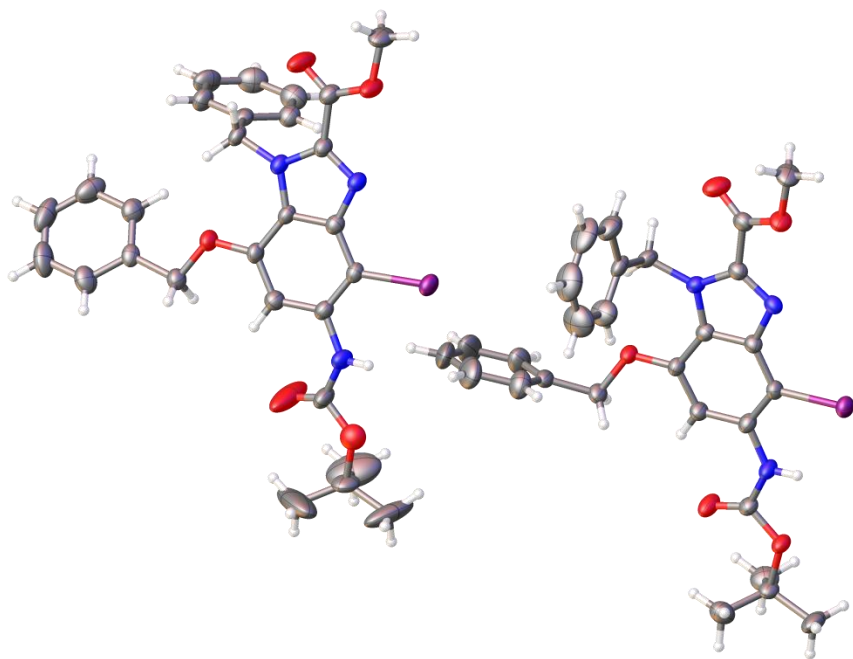

**Figure S1.** X-ray crystal structure of **10**.
